# Supplementary material
Source: PubMed Central journal article supplement (PMC3832011)
Supplement: 1318639110_pnas.201318639SI.pdf [file 1318639110_pnas.201318639SI.pdf]

**Table S1. Cont.**

| CIS        | Chromosome | No. of tumors with CIS* | Unique insertion sites <sup>†</sup> | GKC P value adjusted by chromosome | Entrez Gene ID |
|------------|------------|-------------------------|-------------------------------------|------------------------------------|----------------|
| Magi1      | 6          | 12                      | 15                                  | 0.0350                             | 14924          |
| U6         | 6          | 31                      | 41                                  | 0.0369                             | —              |
| Gm14575    | X          | 33                      | 48                                  | 0.0371                             | 100416098      |
| Rab3c      | 13         | 15                      | 34                                  | 0.0381                             | 67295          |
| Kdm1a      | 4          | 8                       | 9                                   | 0.0389                             | 99982          |
| Cux1       | 5          | 15                      | 18                                  | 0.0395                             | 13047          |
| Akap6      | 12         | 13                      | 14                                  | 0.0401                             | 238161         |
| AC134596.1 | 12         | 12                      | 17                                  | 0.0442                             | —              |
| Lrrc68     | 7          | 6                       | 6                                   | 0.0445                             | 232947         |
| Grif1      | 7          | 8                       | 8                                   | 0.0448                             | 232906         |
| Add3       | 19         | 8                       | 8                                   | 0.0450                             | 27360          |
| Plcx3      | 15         | 8                       | 16                                  | 0.0453                             | 239318         |
| Arid1b     | 17         | 12                      | 14                                  | 0.0456                             | 239985         |
| Ppp2r5e    | 12         | 7                       | 7                                   | 0.0461                             | 26932          |
| U4         | 13         | 10                      | 19                                  | 0.0483                             | —              |

\*Number of independent tumors with insertion within the locus.

<sup>†</sup>Number of nonredundant SB insertions within the locus.

**Table S2. Human orthologs of CIS-derived candidate genes**

| Mouse gene | Human Uniprot ID | Mouse gene | Human Uniprot ID |
|------------|------------------|------------|------------------|
| Add3       | ADDG_HUMAN       | Nr6a1      | NR6A1_HUMAN      |
| Akap6      | AKAP6_HUMAN      | Nrg3       | NRG3_HUMAN       |
| Arhgap5    | RHG05_HUMAN      | Pcsk2      | NEC2_HUMAN       |
| Arid1b     | ARI1B_HUMAN      | Plcx3      | PLCX3_HUMAN      |
| Atp9b      | ATP9B_HUMAN      | Ppp2r5e    | 2A5E_HUMAN       |
| Auts2      | AUTS2_HUMAN      | Pten       | PTEN_HUMAN       |
| Brd4       | BRD4_HUMAN       | Ptn        | PTN_HUMAN        |
| Cdh12      | CAD12_HUMAN      | Rab3c      | RAB3C_HUMAN      |
| Cdkn2a     | CD2A1_HUMAN      | Rap1gds1   | GDS1_HUMAN       |
| Crebbp     | CBP_HUMAN        | Rims1      | RIMS1_HUMAN      |
| Cux1       | CUX1_HUMAN       | Setbp1     | SETBP_HUMAN      |
| Dcaf12     | DCA12_HUMAN      | Slc7a14    | S7A14_HUMAN      |
| Dennd4b    | DEN4B_HUMAN      | Srgap2     | SRGP2_HUMAN      |
| Dgki       | DGKI_HUMAN       | Tjp1       | ZO1_HUMAN        |
| Dyrk1a     | DYR1A_HUMAN      | Trim33     | TRI33_HUMAN      |
| Edil3      | EDIL3_HUMAN      | Tspan7     | TSN7_HUMAN       |
| Fam117b    | F117B_HUMAN      | Ube2d3     | UB2D3_HUMAN      |
| Fbxo41     | FBX41_HUMAN      | Ubr5       | UBR5_HUMAN       |
| Fut9       | FUT9_HUMAN       | Uchl1      | UCHL1_HUMAN      |
| Kdm1a      | KDM1A_HUMAN      | Vsn1       | VISL1_HUMAN      |
| Kdm6a      | KDM6A_HUMAN      | Wac        | WAC_HUMAN        |
| Magi1      | MAGI1_HUMAN      | Zbtb20     | ZBT20_HUMAN      |
| Map3k1     | M3K1_HUMAN       | Zdhc9      | ZDHC9_HUMAN      |
| Nfia       | NFIA_HUMAN       | Zeb1       | ZEB1_HUMAN       |
| Nfix       | NFIX_HUMAN       |            |                  |

**Table S3. Rand Index results for clustering human MB molecular subtypes based on expression data in GSE21140**

| Clustering method | CCG   | CCG + PCA (5) | CCG + network + PCA (9) | Pei signature |
|-------------------|-------|---------------|-------------------------|---------------|
| Average linkage   | 0.499 | 0.627         | 0.569                   | 0.681         |
| Ward              | 0.461 | 0.469         | 0.685                   | 0.699         |
| K-means           | 0.492 | 0.502         | 0.661                   | 0.724         |
| Ward + Sil        | 0.526 | 0.465         | 0.497                   | 0.699         |
| K-means + Sil     | 0.404 | 0.366         | 0.475                   | 0.724         |

CCG, CIS candidate genes; PCA, principal component analysis. Numbers in parentheses represent the number of principal components.
